# Supplementary material for: Adult Human Glioblastomas Harbor Radial Glia-like Cells
Source: PubMed Central journal article supplement — Stem Cell Reports. 2020 Jan 30;14(2):338–50. doi: 10.1016/j.stemcr.2020.01.007 (PMC7014025; doi:10.1016/j.stemcr.2020.01.007), 2020-01-30
Supplement: mmc4.pdf [file mmc4.pdf]

| Patient | Tumor Location | Pathology   | Tumor Status | Gender | Age | Key Mutations                          |
|---------|----------------|-------------|--------------|--------|-----|----------------------------------------|
| GBM1    | Lt temporal    | GBM         | Recurrent    | M      | 59  |                                        |
| GBM2    | Lt parietal    | GBM         | Recurrent    | M      | 68  |                                        |
| GBM3    | Rt occipital   | GBM         | New          | M      | 67  | CDKN Tert                              |
| GBM4    | Lt parietal    | GBM         | secondary    | M      | 38  |                                        |
| GBM5    | Lt temporal    | GBM         | New          | M      | 51  |                                        |
| GBM6    | Lt frontal     | Gliosarcoma | New          | M      | 73  |                                        |
| GBM7    | Lt parietal    | GBM         | Recurrent    | M      | 51  | EGFRviii amp tert PTEN CDKN2           |
| GBM8    | Rt parietal    | GBM         | Recurrent    | M      | 29  |                                        |
| GBM9    | Rt parietal    | GBM         | New          | M      | 66  |                                        |
| GBM10   | Lt occipital   | GBM         | New          | M      | 79  |                                        |
| GBM11   | Rt frontal     | GBM         | Recurrent    | M      | 63  |                                        |
| GBM12   | Lt frontal     | GBM         | Recurrent    | M      | 75  |                                        |
| GBM13   | Rt parietal    | GBM         | New          | F      | 64  | PIK3CA p53 Tert                        |
| GBM14   | Rt temporal    | GBM         | New          | M      | 29  | EGFR amp CDKN2 Tert PIK3R2             |
| GBM15   | Rt parietal    | GBM         | Recurrent    | M      | 29  |                                        |
| GBM16   | Lt parietal    |             | New          | M      | 49  |                                        |
| GBM17   | Lt occipital   | GBM         | New          | M      | 79  |                                        |
| GBM18   | Left frontal   | GBM         | Recurrent    | F      | 43  |                                        |
| GBM19   | Left temporal  | GBM         | New          | F      | 83  |                                        |
| GBM20   | Right temporal | GBM         | New          | F      | 45  |                                        |
| GBM21   | Lt frontal     | GBM         | New          | M      | 61  | PTEN del CDKN2A/B EGFR amp PDGFRA amp  |
| GBM 22  | Lt temporal    | GBM         | Recurrent    | F      | 58  | p53 egfr cdkn2a                        |
| GBM 23  | Lt frontal     | GBM         | Recurrent    | M      | 30  | idh1 p53 MycN                          |
| GBM 24  | Lt frontal     | AO          | Recurrent    | M      | 46  | fgfr2 idh1 kit p53                     |
| GBM 25  | Lt frontal     | GBM         | Recurrent    | F      | 69  | egfr amp                               |
| GBM 26  | Lt temporal    | GBM         | New          | M      | 67  | egfr amp CDK4 PTEN Tert                |
| GBM 30  | Rt occipital   | GBM         | New          | M      | 80  | egfr amp p53 cdk4 tert                 |
| GBM 31  | Rt frontal     | GBM         | New          | M      | 48  | egfrviii                               |
| GBM 32  | Rt frontal     | GBM         | Recurrent    | M      | 50  | egfrviii, PTEN del, NF1, Tert          |
| GBM 33  | Lt parietal    | GBM         | New          | M      | 71  | egfr                                   |
| GBM 34  | Lt parietal    | GBM         | Recurrent    | M      | 73  | egfr, PIK3CA, ERBB2                    |
| GBM 35  | Lt parietal    | GBM         | New          | M      | 54  | egfrviii                               |
| GBM 36  | Lt parietal    | GBM         | Recurrent    | M      | 55  | egfr amp, PTEN del, Tert, Egfrviii del |
| GBM 37  | Lt occipital   | GBM         | New          | F      | 56  | egfr amp,                              |
| GBM 38  | Lt occipital   | GBM         | Recurrent    | F      | 57  | OIK3CA, EGFR amp, EGFR, PTEN, p53      |
| GBM 39  | Rt temporal    | GBM         | Recurrent    | M      | 69  | Tert p53 PIK3R1                        |
| GBM 40  | Rt temporal    | GBM         | Recurrent    | M      | 31  | NA                                     |

**Table S2. Key mutations in tumor samples used in the manuscript, except for scRNA samples.** Shaded cells highlight matching new and recurrent tumors. Data based on targeted sequencing.
